# Supplementary material for: Light induced catalytic intramolecular hydrofunctionalization of allylphenols mediated by porphyrin rhodium(iii) complexes
Source: Royal Society of Chemistry journal article supplement (doi:10.1039/c6dt01653g), 2016-01-01
Supplement: c6dt01653g1.pdf [file c6dt01653g1.pdf]

## Light induced catalytic intramolecular hydrofunctionalization of allylphenol mediated by porphyrin rhodium(III) complexes

Xu Liu, Zikuan Wang and Xuefeng Fu\*

*Beijing National Laboratory for Molecular Sciences, State Key Lab of Rare Earth Materials*

*Chemistry and Applications, Peking University, Beijing, 100871, China. Fax: +86 10 6275 1708; Tel: +86 10 6275 6035; E-mail: [fuxf@pku.edu.cn](mailto:fuxf@pku.edu.cn)*

### Contents

1. General consideration
2. Preparation of (TAP)Rh<sup>III</sup>(I)
3. Independent synthesis of the key intermediate (2,3-dihydrobenzofuran-2-yl)methyl rhodium porphyrin complex **3**
4. General procedure for (TAP)Rh<sup>III</sup> mediated catalytic intramolecular hydrofunctionalization of allylphenol
5. Single crystal X-ray diffraction data of (2,3-dihydrobenzofuran-2-yl)methyl rhodium porphyrin complex **3**

### 1. General considerations

C<sub>6</sub>D<sub>6</sub> and CDCl<sub>3</sub> were purchased from Cambridge Isotope Laboratory Inc.; (Rh(CO)<sub>2</sub>Cl)<sub>2</sub> from Strem Chemicals Inc.; and all other chemicals were purchased from Alfa Aesar or J&K Scientific Ltd. and used as received unless otherwise noted. <sup>1</sup>H NMR spectra were recorded on a Bruker AVII-400 spectrometer at ambient temperature. GC-MS results were obtained by the Agilent 7980A/5975C GC/MSD system equipped with the DB-17MS (30m, 0.25mm, 0.25 μm) column. ESI-MS results were obtained by a Bruker Apex IV FTMS spectrometer. Light in the irradiation experiments was provided by a 500W high-pressure mercury lamp (CHF-XM35-500W, Beijing Trusttech Co., Ltd.) and the glass vessel was positioned about 20.0 cm away from the light source.

### 2. Preparation of (TAP)Rh<sup>III</sup>-I

TAPH<sub>2</sub> was synthesized according to Adler's report.<sup>1</sup> [RhCl(CO)<sub>2</sub>]<sub>2</sub> (42.0 mg) dissolved in 2 mL of chloroform was added dropwise into a two-neck flask containing 80.0 mg of TAPH<sub>2</sub> and 90.0 mg of sodium acetate suspended in 30 mL of chloroform under N<sub>2</sub> atmosphere. The mixture was stirred at room temperature for 1 h, and then 56.0 mg of I<sub>2</sub> dissolved in 2 mL of chloroform was added to the solution. The reaction mixture was further stirred for another 3 h. The crude product was filtrated to remove sodium acetate, and then concentrated by rotary evaporation. Subsequent

chromatography on neutral alumina using 4:1 (v/v) dichloromethane vs ethyl acetate gave the (TAP)Rh<sup>III</sup>-I with a yield of 60%. <sup>1</sup>H NMR (400 MHz, CDCl<sub>3</sub>) δ(ppm): 8.89 (8H, s), 8.07-8.15 (8H, m), 7.23-7.29 (8H, m), 4.08 (12H, s).

### 3. Independent synthesis of the key intermediate (2,3-dihydrobenzofuran-2-yl)methyl rhodium porphyrin complex 3

A 0.3 mL C<sub>6</sub>D<sub>6</sub> solution of (TAP)Rh-I (0.017 M), 2-allylphenol (0.33 M) and 2,6-di-*tert*-butylpyridine (0.20 M) was heated at 60 °C for 12 hours, producing complex 3 with a NMR yield of 95% with dibromomethane as internal standard. The crude product was concentrated by rotary evaporation after reaction, and chromatographed on neutral alumina using dichloromethane as the eluent, giving complex 3 in an overall yield of 85%. <sup>1</sup>H NMR (400 MHz, C<sub>6</sub>D<sub>6</sub>) δ (ppm): 9.03 (8H, s), 8.20 (4H, m), 7.96 (4H, m), 7.17 (4H, m), 7.04 (4H, m), 6.34 (1H, m), 6.12 (2H, m), 5.78 (1H, m), 3.56 (12H, s), -0.01 (1H, m), -1.04 (1H, m), -1.68 (1H, m), -4.31 (1H, m), -4.51 (1H, m). ESI-MS results (C<sub>57</sub>H<sub>45</sub>N<sub>4</sub>O<sub>5</sub>RhNa, m/z = 991.232, calcd 991.233; Figure 2S) also confirmed the formation of (2,3-dihydrobenzofuran-2-yl)methyl rhodium porphyrin complex. In addition, the <sup>1</sup>H NMR spectrum of independently synthesized (2,3-dihydrobenzofuran-2-yl)methyl rhodium porphyrin complex agreed very well with that observed *in situ*.

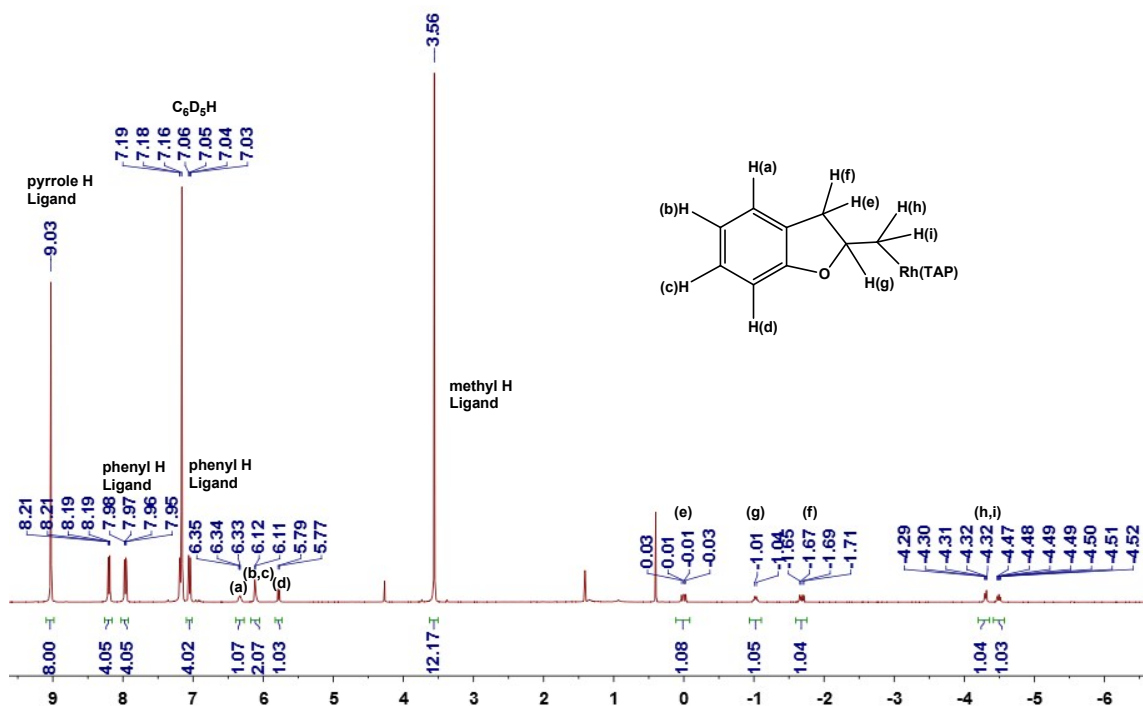

**Figure 1S** <sup>1</sup>H NMR spectrum of complex 3 (400 MHz, C<sub>6</sub>D<sub>6</sub>)

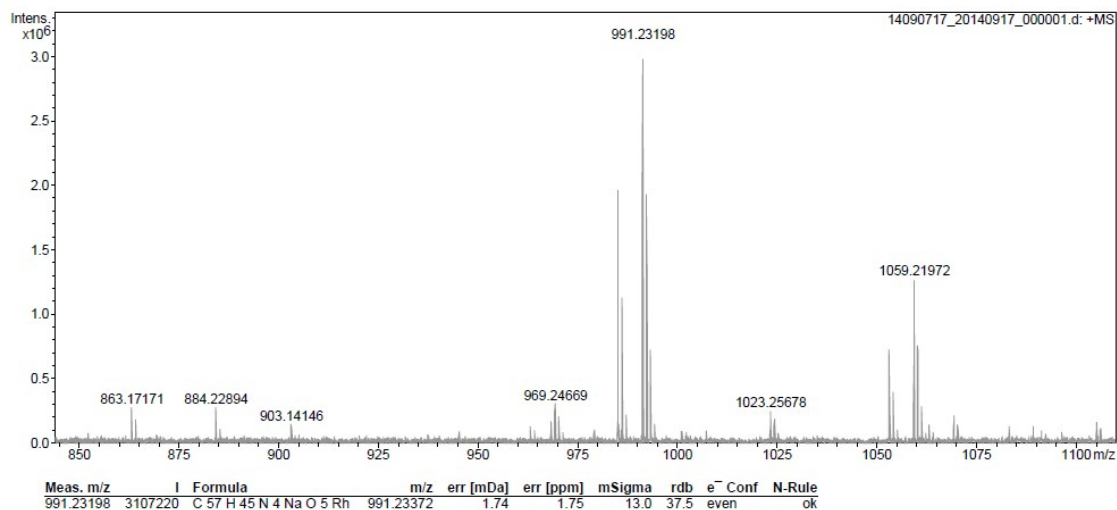

**Figure 2S** ESI-MS spectrum of complex **3** (ESI-MS: 991.232 and Exact Mass: 991.233).

#### 4. General procedure for (TAP)Rh<sup>III</sup> mediated catalytic intramolecular hydrofunctionalization of allylphenol

A 0.3 mL of C<sub>6</sub>D<sub>6</sub> solution containing (TAP)Rh-I (1.67mM), different kinds of substituted 2-allylphenol (0.667 M) and HNet<sub>2</sub> (0.233 M) was added to a J. Young Valve NMR tube. The sample was degassed by three freeze-pump-thaw cycles and refilled with 1 atm of N<sub>2</sub>. Irradiating the solution for 36 hours (500 W Hg lamp, 20 cm distance) produced 2-methylbenzofuran which was detected and quantified by <sup>1</sup>H NMR.

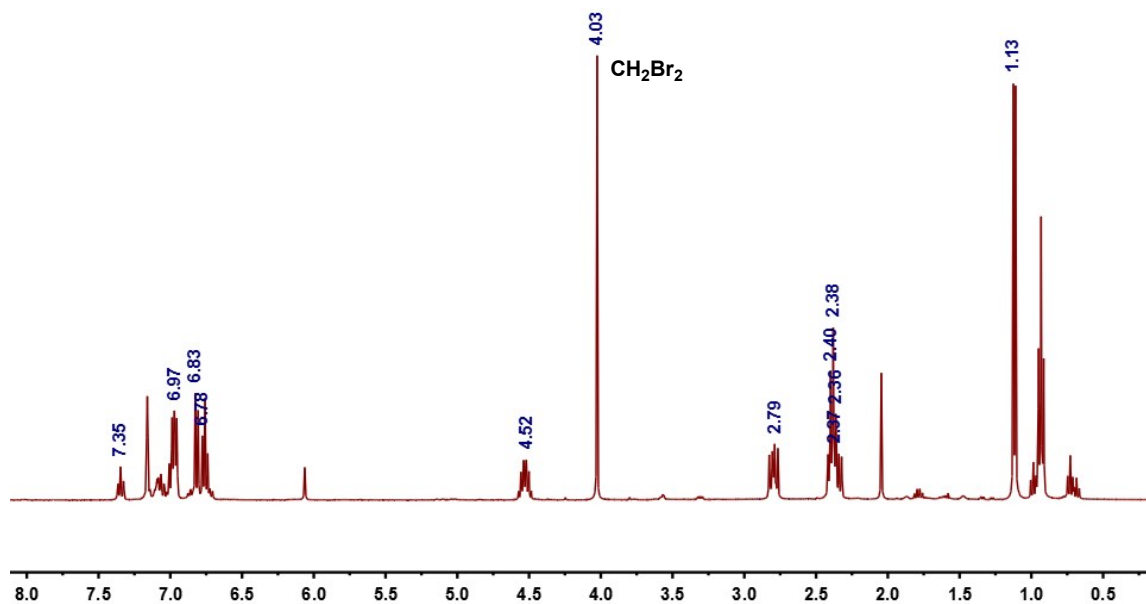

**Figure 3S** <sup>1</sup>H NMR spectrum of 2-methyl-2,3-dihydrobenzofuran (with dibromomethane as the inner standard, 400 MHz, C<sub>6</sub>D<sub>6</sub>),  $\delta$  (ppm): 7.35 (1H, m), 6.97 (1H, m), 6.83 (1H, m), 6.78 (1H, m), 4.52

(1H, m), 2.79 (1H, m), 2.40 (1H, m), 1.13 (3H, d).

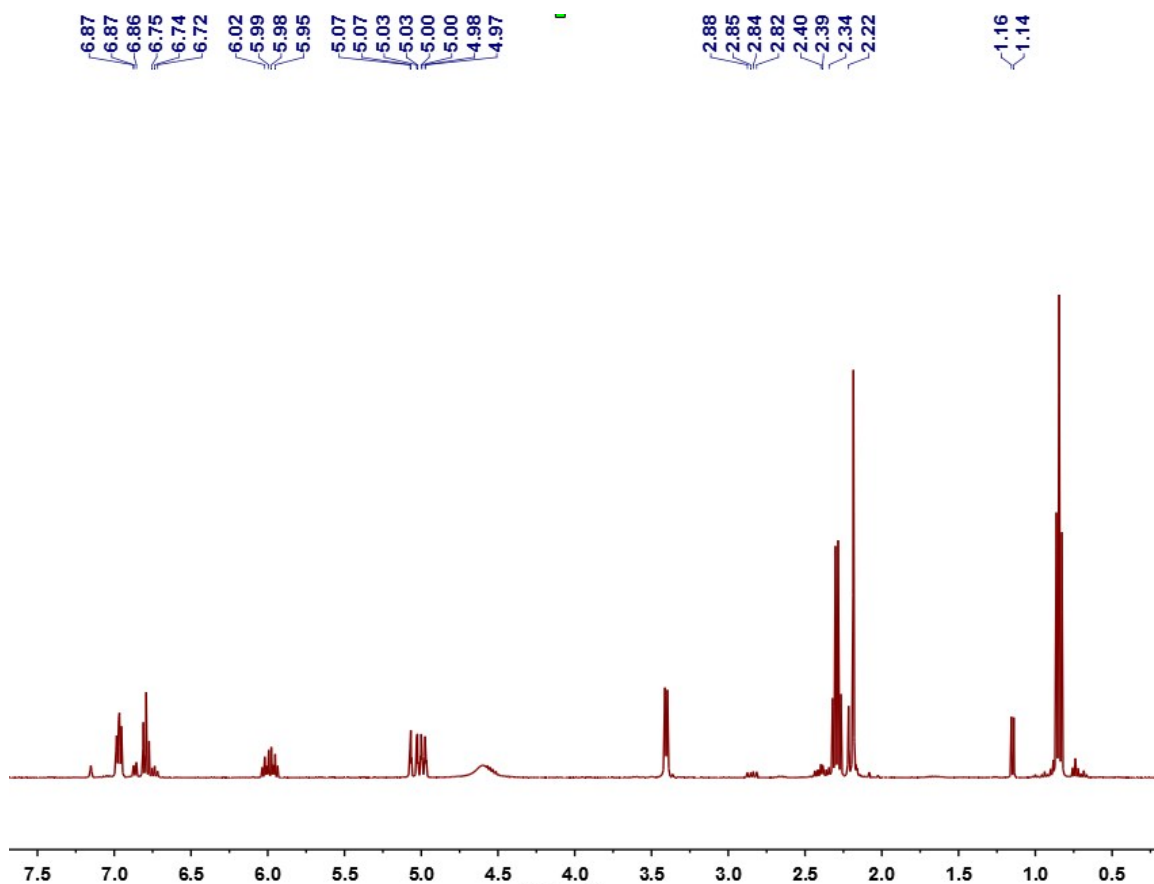

**Figure 4S**  $^1\text{H}$  NMR spectrum of the reaction solution of hydrofunctionalization of 2-allyl-6-methylphenol (400 MHz,  $\text{C}_6\text{D}_6$ ). The signals of products were shown as  $\delta$  (ppm): 6.68 (2H, m), 6.72 (1H, m), 6.00 (1H, m), 2.85 (1H, m), 2.36 (1H, m), 2.22 (3H, s), 1.15 (2H, d). The other set of signals corresponded to the remaining 2-allyl-6-methylphenol.

- The active catalyst was  $(\text{TAP})\text{Rh}^{\text{III}}\text{-NEt}_2$ , which was confirmed by  $^1\text{H}$  NMR and ESI-MS (Figure 5S-6S);
- After irradiation of the reaction solution for 5h, the form of catalyst was  $(\text{TAP})\text{Rh}^{\text{III}}\text{-NEt}_2$  (characteristic signal at 9.16 ppm), and complex 3 (characteristic signals at 9.01, -1.05, -4.34, -4.51 ppm), which could be confirmed by  $^1\text{H}$  NMR (Figure 7S)

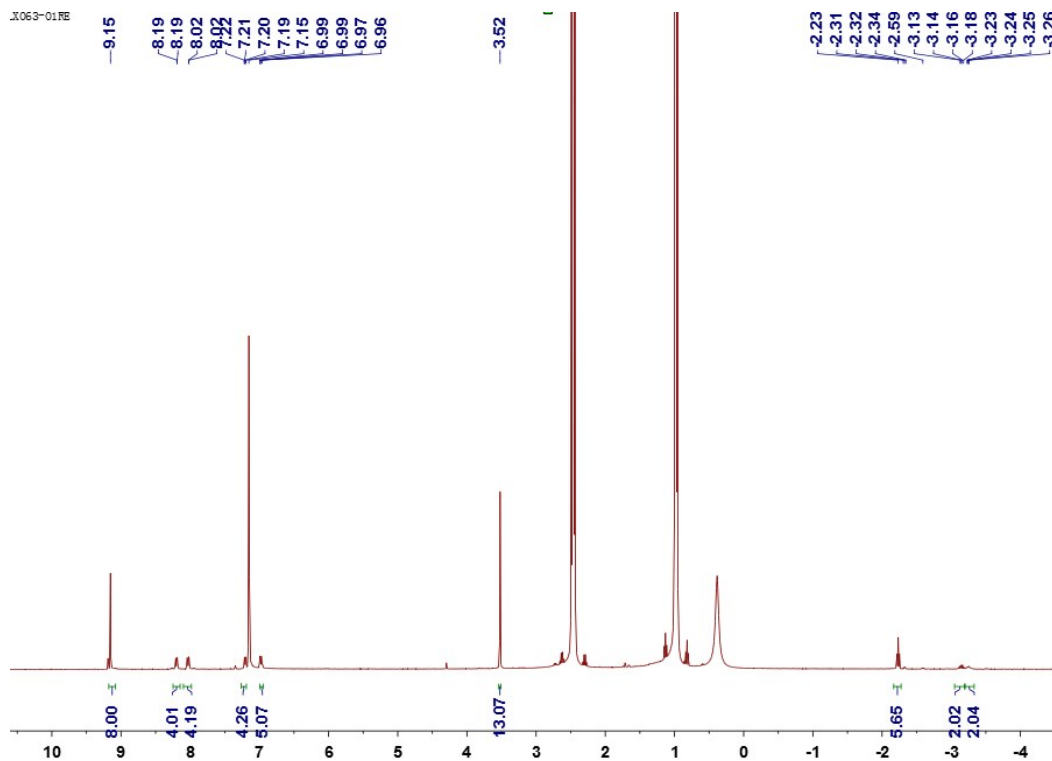

**Figure 5S.**  $^1\text{H}$  NMR spectrum of the mixed solution of (TAP)Rh-I (1.67mM) and  $\text{HNet}_2$  (0.233 M) (400 MHz,  $\text{C}_6\text{D}_6$ ).

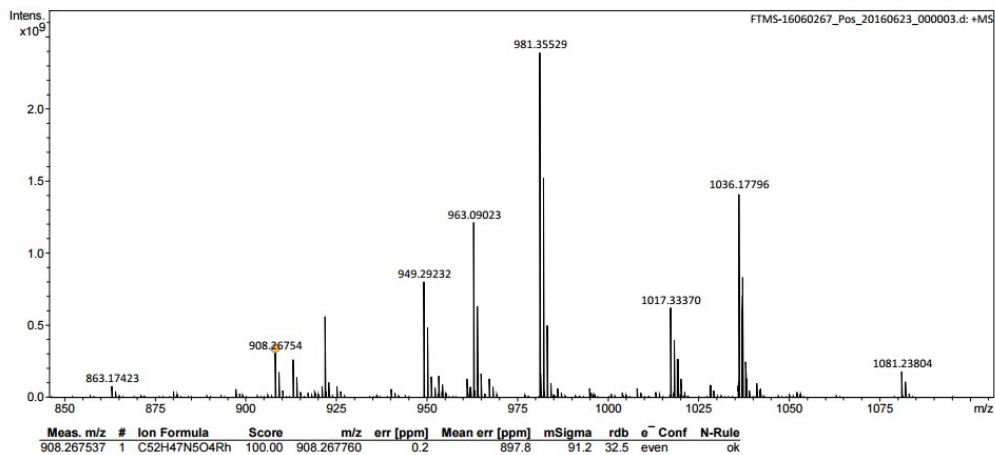

**Figure 6S.** ESI-MS spectrum of (TAP)Rh<sup>III</sup>- $\text{Net}_2$  complex

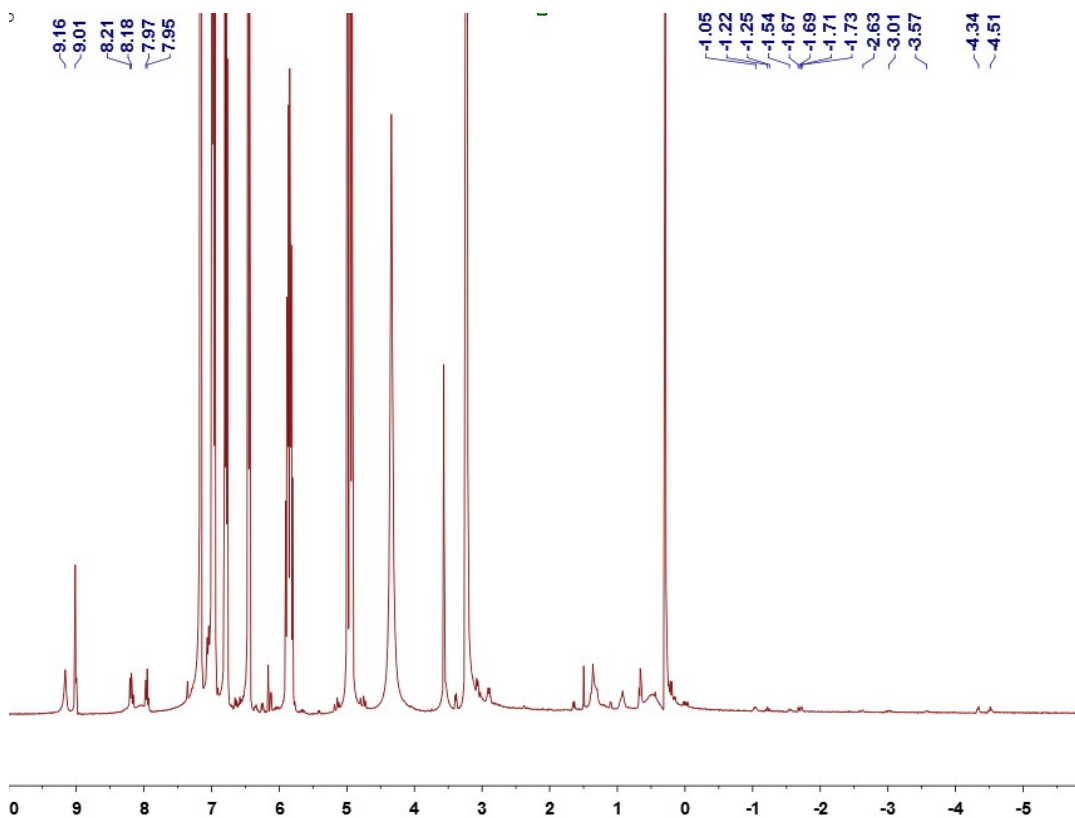

**Figure 7S.**  $^1\text{H}$  NMR spectrum of the reaction solution after irradiation for 5 hours. (400 MHz,  $\text{C}_6\text{D}_6$ )

## 5. Characterization of complex 3 by Single crystal X-ray diffraction

Single crystals suitable for X-ray diffraction analysis were obtained by slow diffusion of 0.5ml water into 0.3 mL THF of complex 3 (0.01 M).

Selected bond lengths [ $\text{\AA}$ ] and angles[ $^\circ$ ]: Rh2-N5 2.031, Rh2-N6 2.037, Rh2-N7 2.038, Rh2-N8 2.022, Rh2-C1A 2.151; N5-Rh2-N6 90.20, N6-Rh2-N7 90.46, N7-Rh2-N8 89.57, N8-Rh2-N5 89.76, N5-Rh2-C1A 90.62, N5-Rh2-C1A 87.28, N5-Rh2-C1A 89.67, N5-Rh2-C1A 96.98.

The deposition number of CCDC is 1476559.

### Crystal data and structure refinement for complex 3

|                      |                                                                                                              |
|----------------------|--------------------------------------------------------------------------------------------------------------|
| Empirical formula    | $\text{C}_{117.4}\text{H}_{97.4}\text{I}_{0.1}\text{N}_8\text{O}_{10.9}\text{Rh}_2$                          |
| Formula weight       | 2009.45                                                                                                      |
| Temperature          | 173.1500 K                                                                                                   |
| Wavelength           | 0.71073 $\text{\AA}$                                                                                         |
| Crystal system       | Triclinic                                                                                                    |
| Space group          | P -1                                                                                                         |
| Unit cell dimensions | $a = 12.1532(17) \text{ \AA}$ $a = 68.884(4)^\circ$ .<br>$b = 21.943(3) \text{ \AA}$ $b = 81.902(6)^\circ$ . |

|                                      |                                                                    |
|--------------------------------------|--------------------------------------------------------------------|
|                                      | $c = 22.090(3) \text{ \AA}$ $\beta = 80.570(5)^\circ$ .            |
| Volume                               | 5399.5(12) $\text{\AA}^3$                                          |
| Z                                    | 2                                                                  |
| Density (calculated)                 | 1.236 $\text{Mg/m}^3$                                              |
| Absorption coefficient               | 0.386 $\text{mm}^{-1}$                                             |
| F(000)                               | 2078                                                               |
| Crystal size                         | 0.22 x 0.13 x 0.09 $\text{mm}^3$                                   |
| range for data collection            | 0.992 to $27.507^\circ$ .                                          |
| Index ranges                         | $-15 \leq h \leq 15$ , $-28 \leq k \leq 28$ , $-28 \leq l \leq 28$ |
| Reflections collected                | 62197                                                              |
| Independent reflections              | 24524 [ $R(\text{int}) = 0.0599$ ]                                 |
| Completeness to theta                | $25.242^\circ$ 99.5 %                                              |
| Absorption correction                | Semi-empirical from equivalents                                    |
| Max. & min. transmission             | 1.0000 and 0.8981                                                  |
| Refinement method                    | Full-matrix least-squares on $F^2$                                 |
| Data / restraints / parameters       | 24524 / 36 / 1270                                                  |
| Goodness-of-fit on $F^2$             | 1.194                                                              |
| Final R indices [ $I > 2\sigma(I)$ ] | $R_1 = 0.0983$ , $wR_2 = 0.2582$                                   |
| R indices (all data)                 | $R_1 = 0.1187$ , $wR_2 = 0.2858$                                   |
| Extinction coefficient               | n/a                                                                |
| Largest diff. peak and hole          | 1.328 and $-1.086 \text{ e.\AA}^{-3}$                              |

## Reference

- (1) Adler, A. D.; Longo, F. R.; Finarelli, J. D.; Goldmacher, J.; Assour, J.; Korsakoff, L. *J. Org. Chem.* **1967**, *32*, 476.
